# Supplementary material
Source: publisher figshare collection journal article supplement (https://acs.figshare.com/ndownloader/files/4265962)
Supplement: Supplementary file 1 [file 4265962]

## SUPPORTING INFORMATION PARAGRAPH

### DLS and rheological measurements of Me<sub>2</sub>PE-C32-Me<sub>2</sub>PE at pH 5

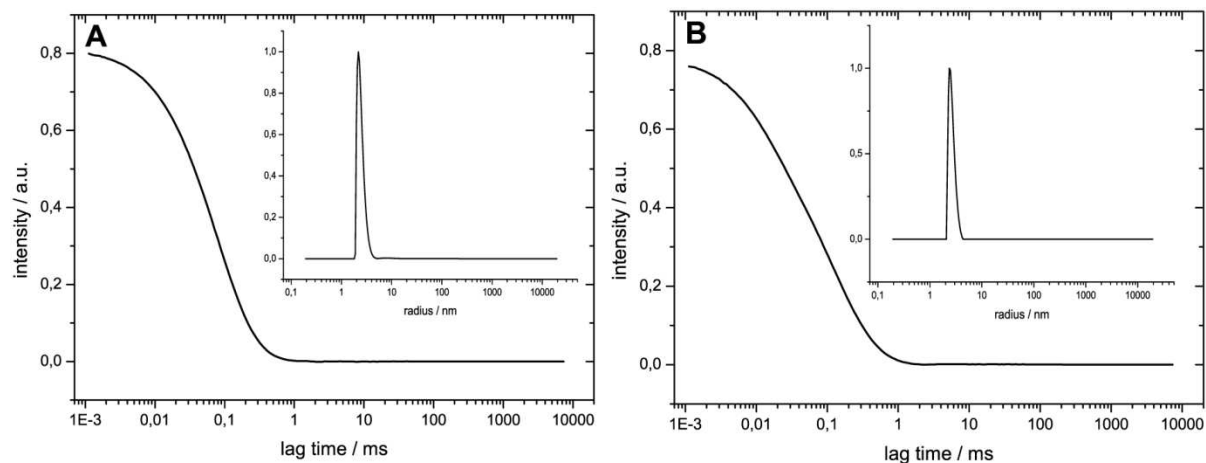

**Figure S1:** Autocorrelation function and fit for aqueous suspensions ( $c = 1 \text{ mg ml}^{-1}$ ) of Me<sub>2</sub>PE-C32-Me<sub>2</sub>PE at **A** pH 11 and **B** pH 12 at 30 °C. The inset shows the number weighted size distribution.

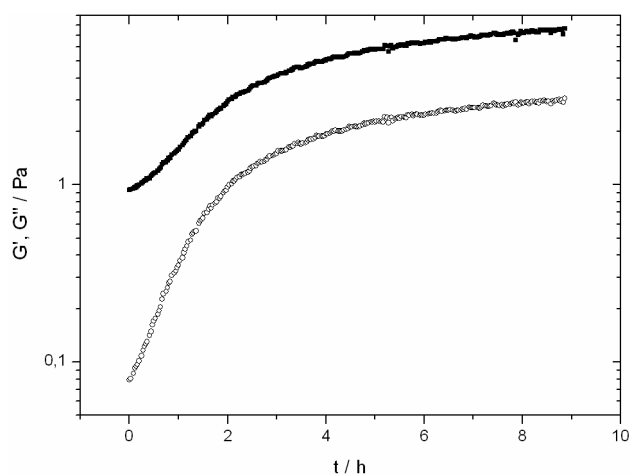

**Figure S2:** Time dependent rheological data of an aqueous suspension of Me<sub>2</sub>PE-C32-Me<sub>2</sub>PE ( $c = 1 \text{ mg ml}^{-1}$ ) in buffer at pH 5 at 2 °C after heating to 80 °C and subsequent cooling to 2 °C. The heating and cooling rate was  $20 \text{ K h}^{-1}$ ,  $\omega = 1 \text{ rad s}^{-1}$  and  $\gamma = 1 \%$ . G': solid squares, G'': open circles.

### Rheological data of Me<sub>2</sub>PE-C32-Me<sub>2</sub>PE at pH 11 with MgCl<sub>2</sub> and KCl

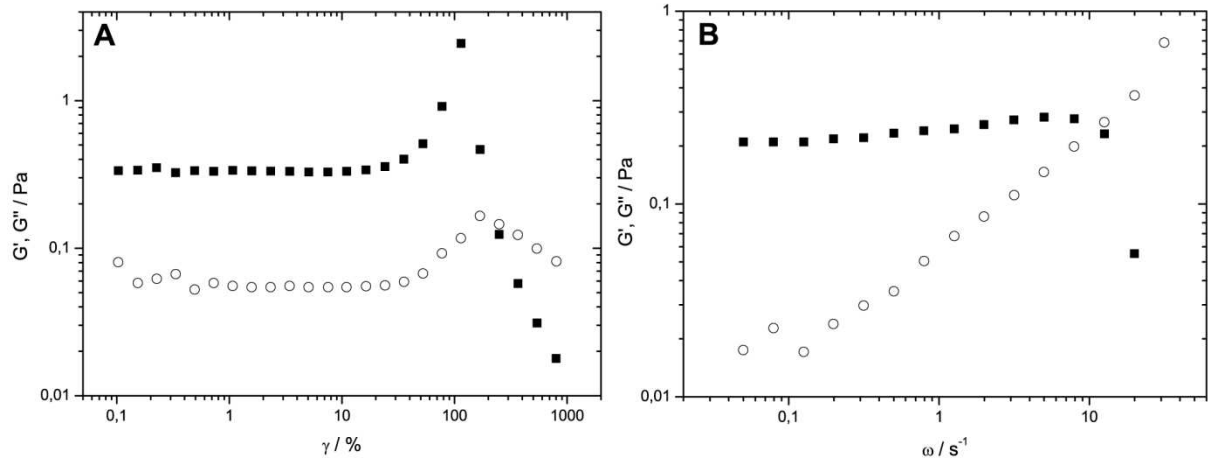

**Figure S3:** **A** amplitude sweep ( $\omega = 1 \text{ rad s}^{-1}$ ) and **B** frequency sweep ( $\gamma = 1 \%$ ) of a suspension of Me<sub>2</sub>PE-C32-Me<sub>2</sub>PE ( $c = 1 \text{ mg ml}^{-1}$ ) at pH 11 with 100 mM MgCl<sub>2</sub> at 2 °C.  $G'$ : filled squares,  $G''$ : open circles.

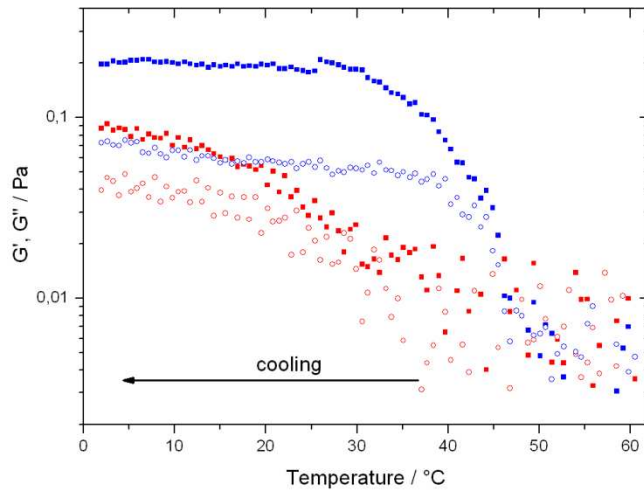

**Figure S4:** Temperature dependent rheological data of the Me<sub>2</sub>PE-C32-Me<sub>2</sub>PE suspensions ( $c = 1 \text{ mg ml}^{-1}$ ) at pH 11 with 250 mM (red) and 1 M (blue) KCl ( $G'$ : filled squares,  $G''$ : open circles) during the cooling process. The cooling rate was  $20 \text{ °C h}^{-1}$ . Deformation ( $\gamma = 1 \%$ ) and angular frequency ( $\omega = 1 \text{ rad s}^{-1}$ ) were chosen inside the linear viscoelastic region.

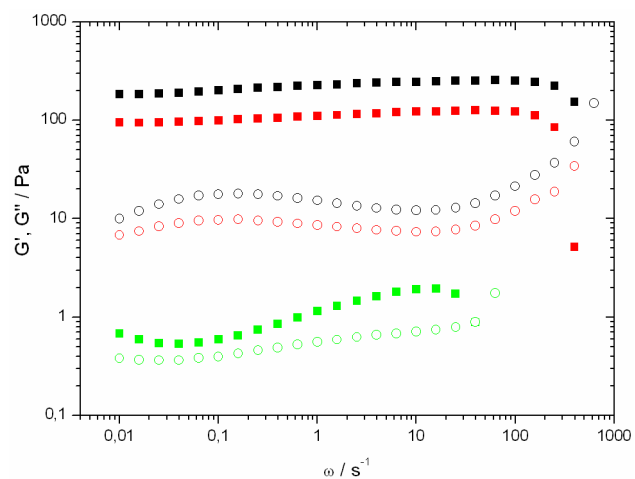

**Figure S5:** Frequency sweeps (with  $\gamma = 1 \%$ ) of a suspension of  $\text{Me}_2\text{PE-C32-Me}_2\text{PE}$  ( $c = 8 \text{ mg ml}^{-1}$ ) in buffer at pH 5 at 2 °C (black), 20 °C (red), and 55 °C (green).  $G'$ : filled squares,  $G''$ : open circles.
